# Supplementary material for: Photosymbiosis in Late Triassic scleractinian corals from the Italian Dolomites
Source: PeerJ journal article supplement (doi:10.7717/peerj.11062), 2021-03-16

# morphological integration

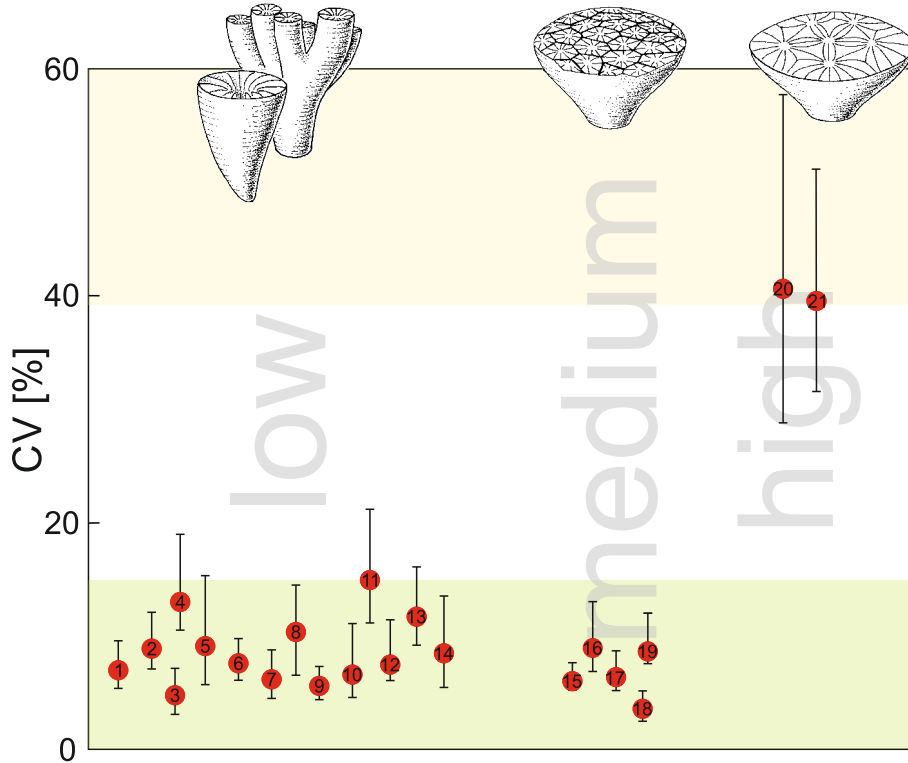

Supplement: Supplemental_Figure_S6_revised.pdf [file Supplemental_Figure_S6_revised.pdf]
